# Supplementary material for: Crosstalk between microRNA expression and DNA methylation drives the hormone-dependent phenotype of breast cancer
Source: PubMed Central journal article supplement (PMC8086068; doi:10.1186/s13073-021-00880-4), 2021-04-29

Fig. S1

**Oslo2**

**TCGA**

- miRNA expression - Agilent array designID 029297
- Unit: log2
- Illumina HumanMethylation450 array
- Unit: beta values

- miRNA expression - IlluminaHiSeq miRNASeq
- Unit: log2(RPM+1)
- Illumina HumanMethylation450 array
- Unit: beta values

- Samples with miRNA and methylation: n=297
- Filter out miRNAs expressed in  $\leq 10\%$
  - Filter out CpGs with interquartile range (IQR)  $\leq 0.1$

- Samples with miRNA and methylation: n=439
- Filter out miRNAs expressed in  $\leq 10\%$
  - Filter out CpGs with IQR  $\leq 0.1$

Only consider overlapping miRNAs and CpGs  
 → 346 miRNAs  
 → 142 804 CpGs

Spearman correlation: 346 miRNAs x 142 804 CpGs  
 Bonferroni-corrected p-value < 0.05

**Oslo2:** 140 443 significant miRNA-CpG associations

**TCGA:** 1 351 887 significant miRNA-CpG associations

Overlap: 89 118 miRNA-CpG associations  
 → miRNA-methylation Quantitative Trait Loci (mimQTL)

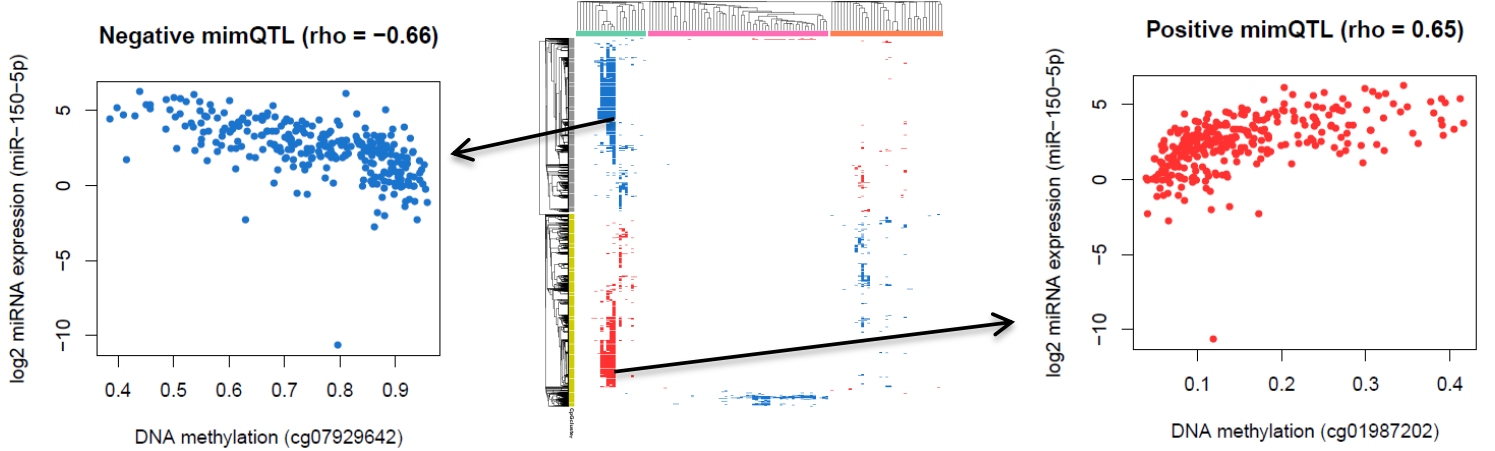

**Definitions**

- Cis association:** Any association between a CpG and a miRNA located on the *same* chromosome
- Trans association:** Any association between a CpG and a miRNA located on *different* chromosomes

Fig. S2

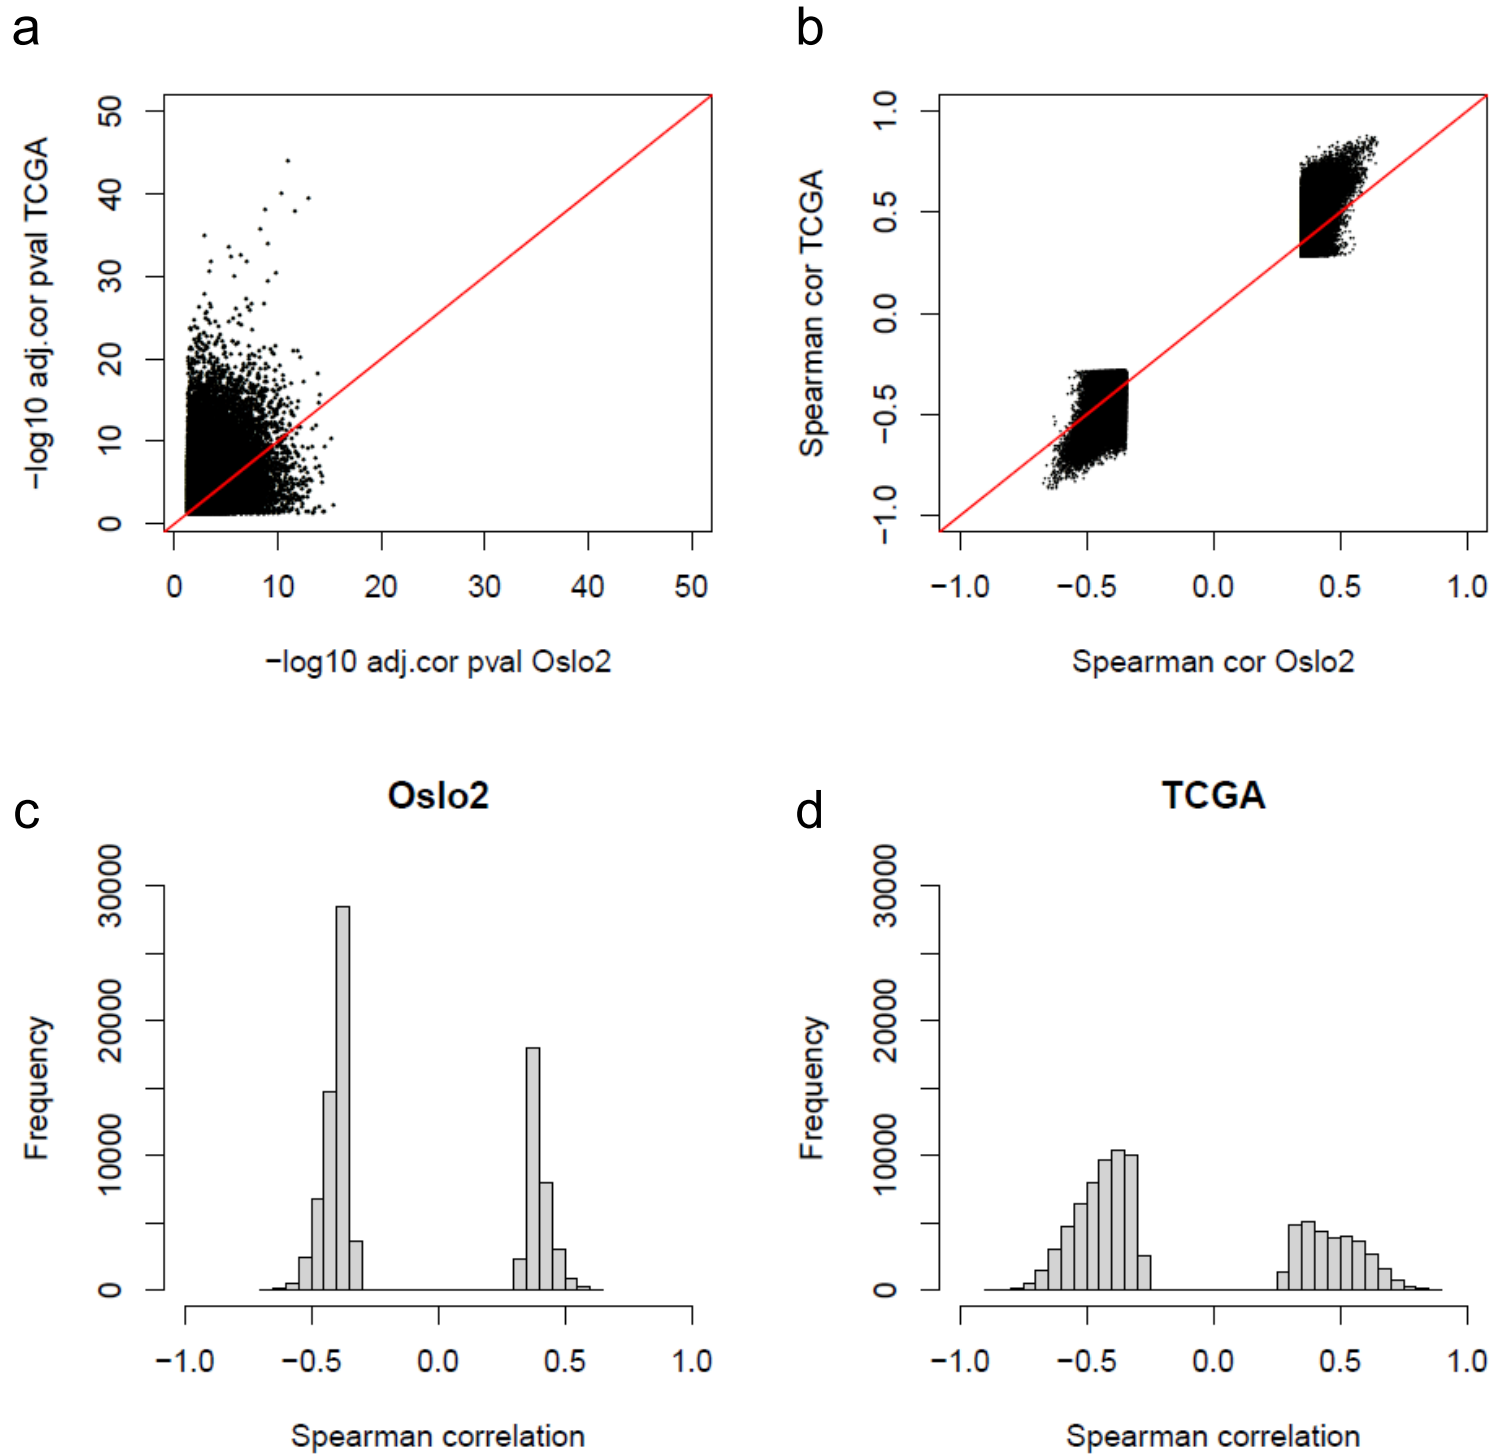

Fig. S3

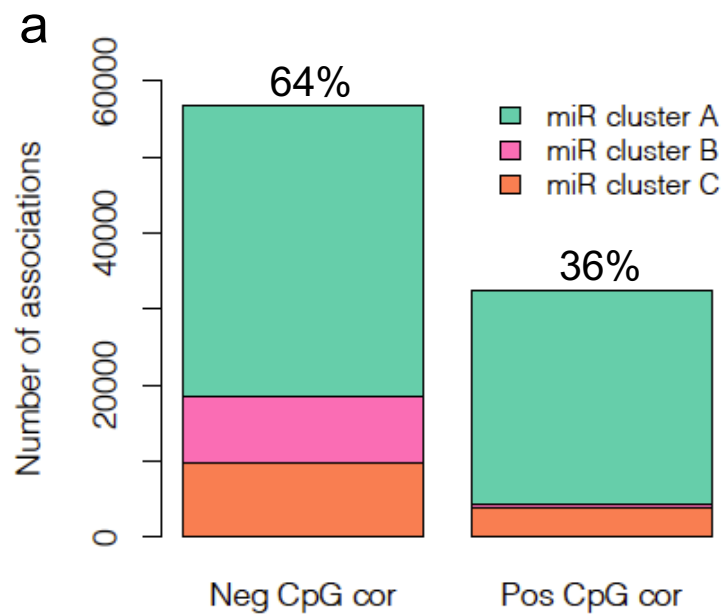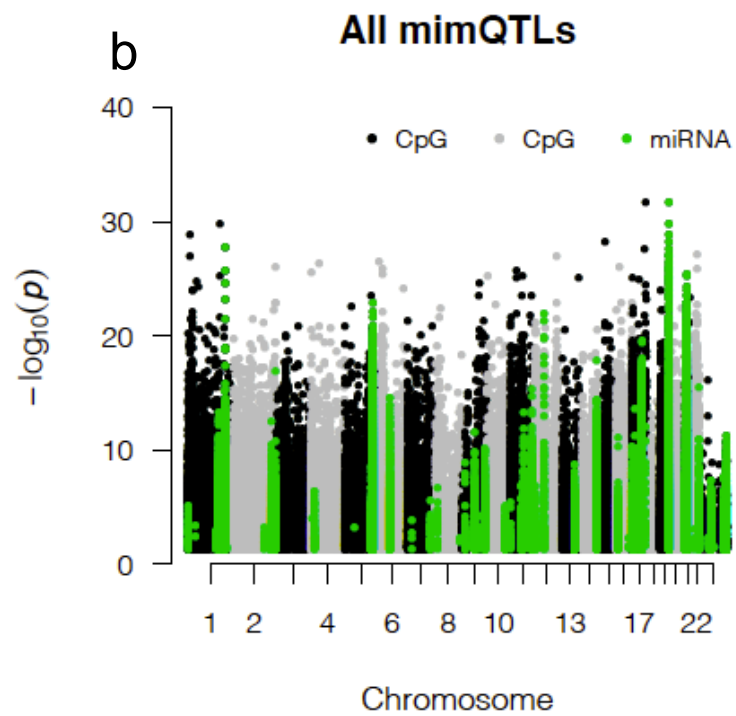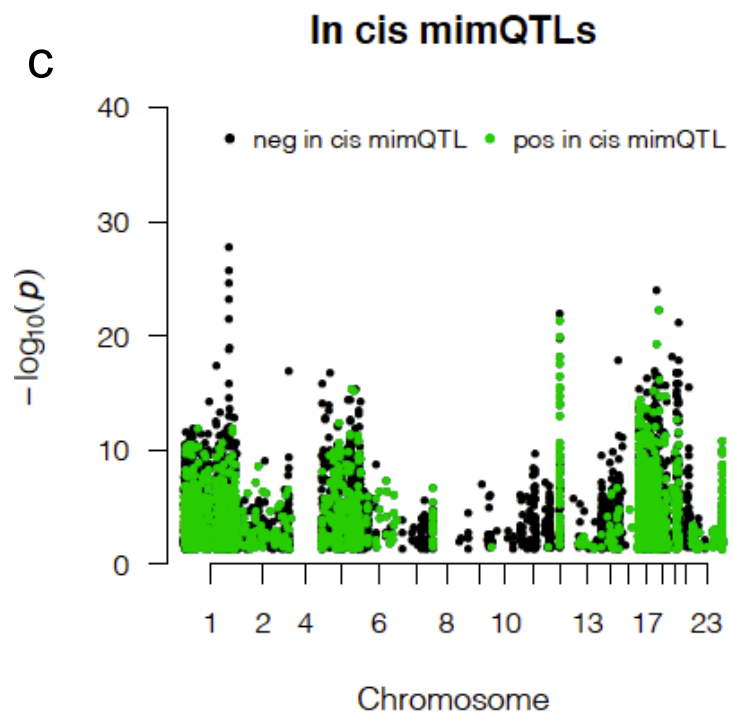

Fig. S4

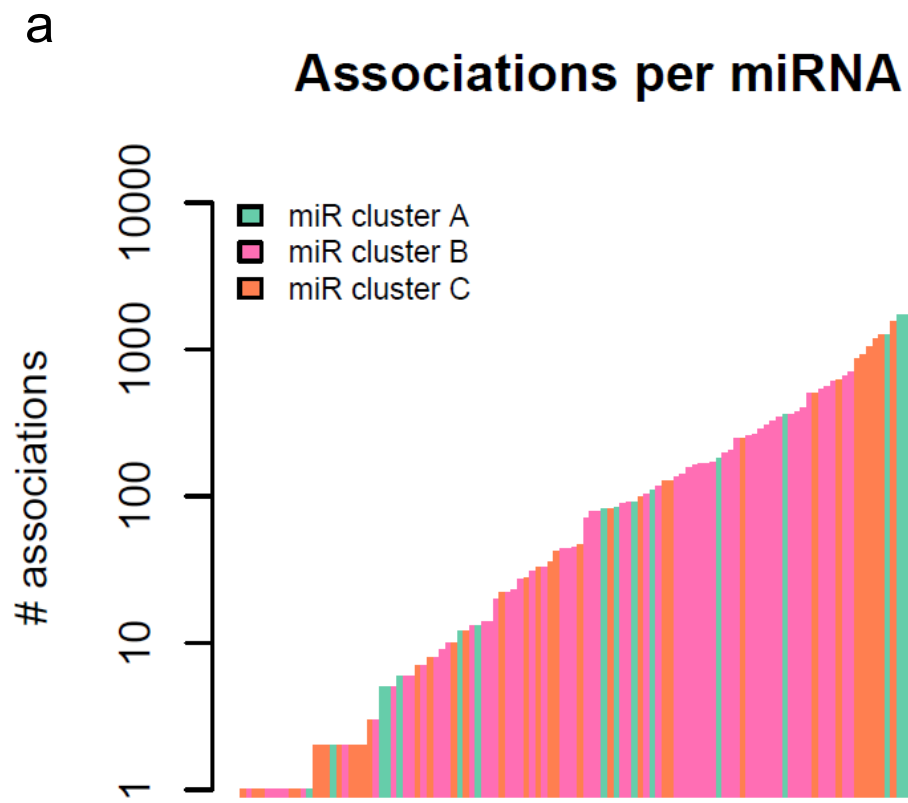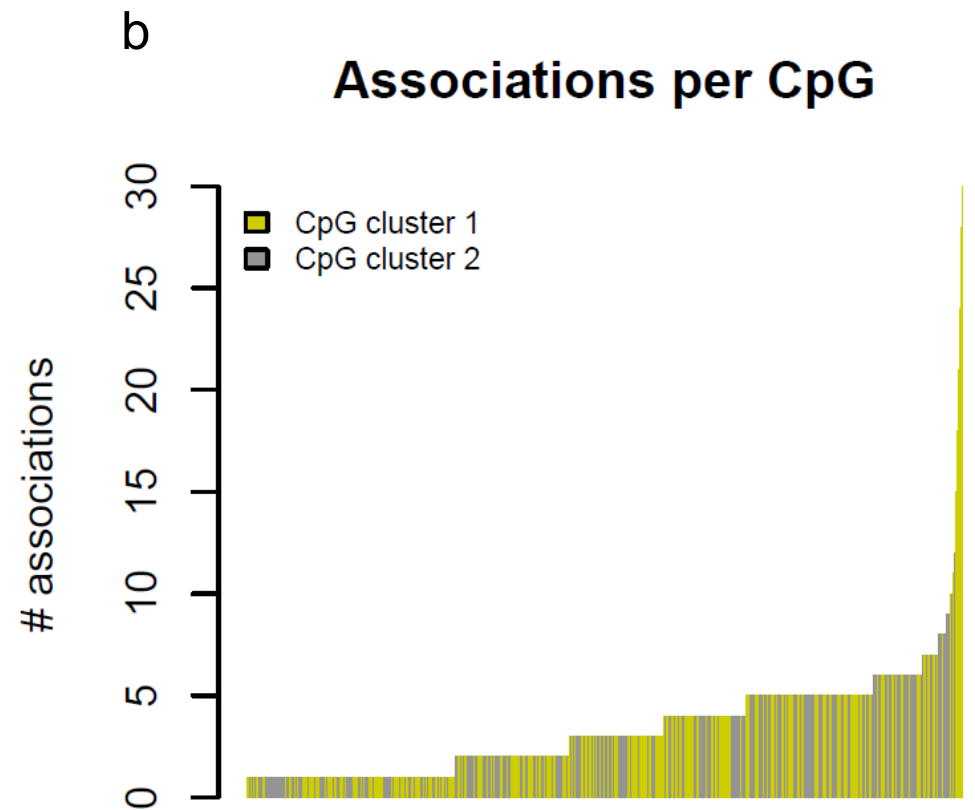

Fig. S5

Oslo2

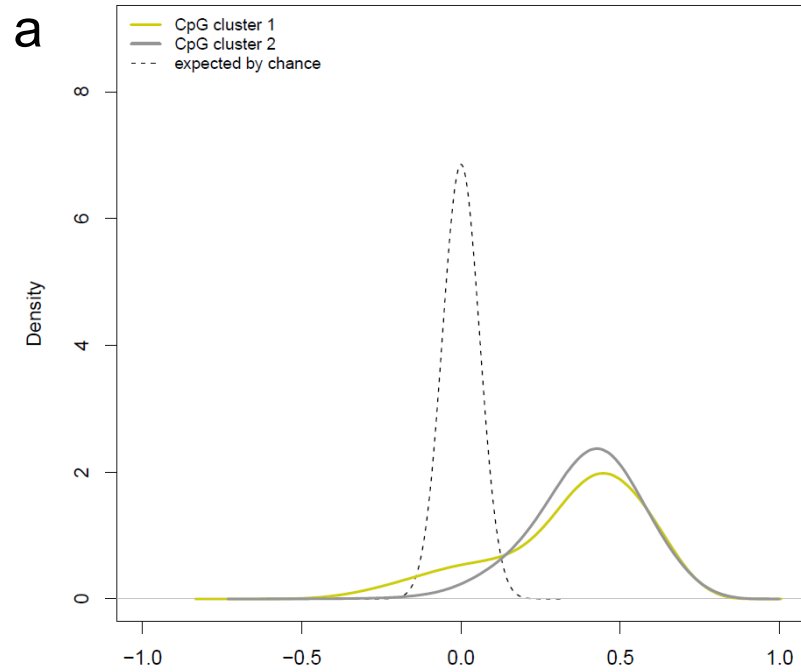

TCGA

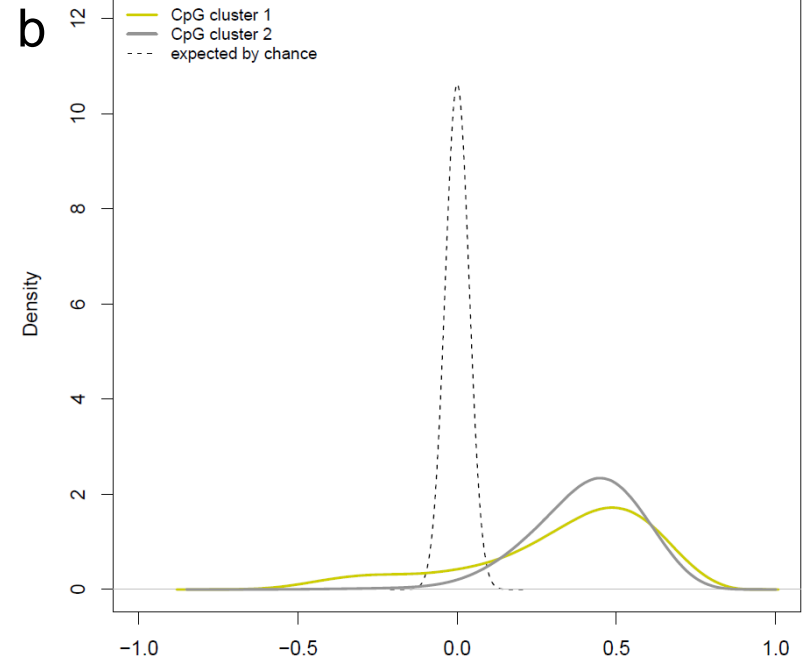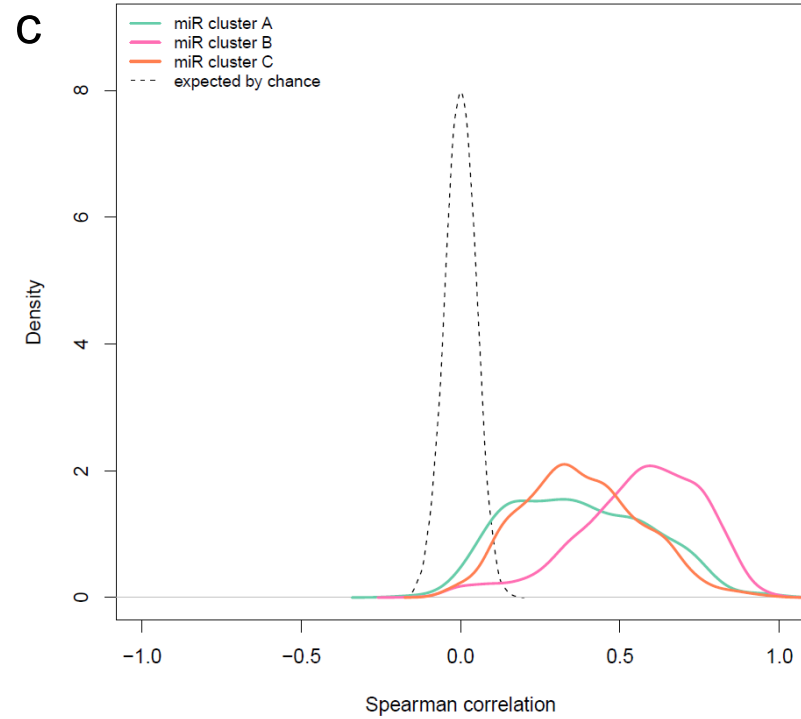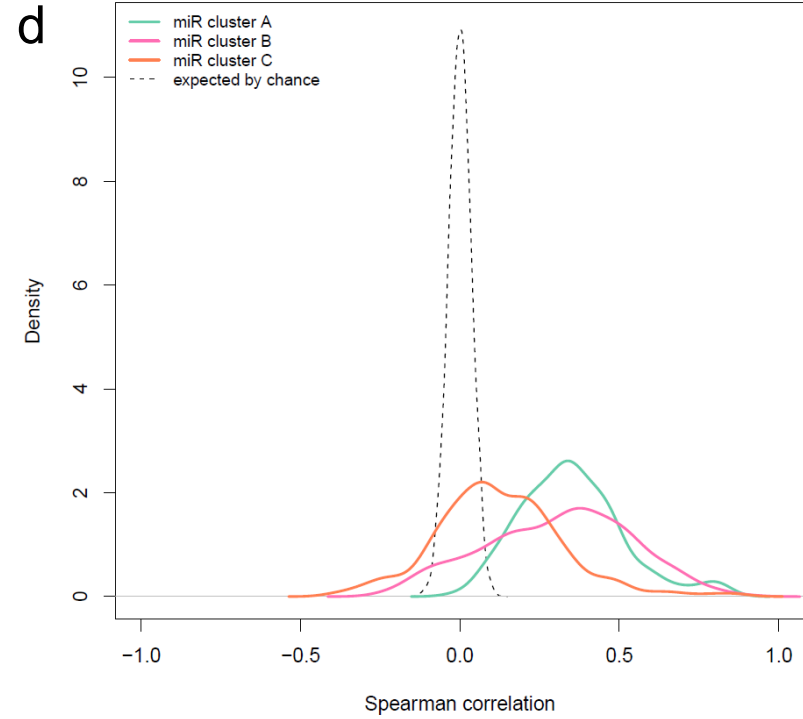

Fig. S6

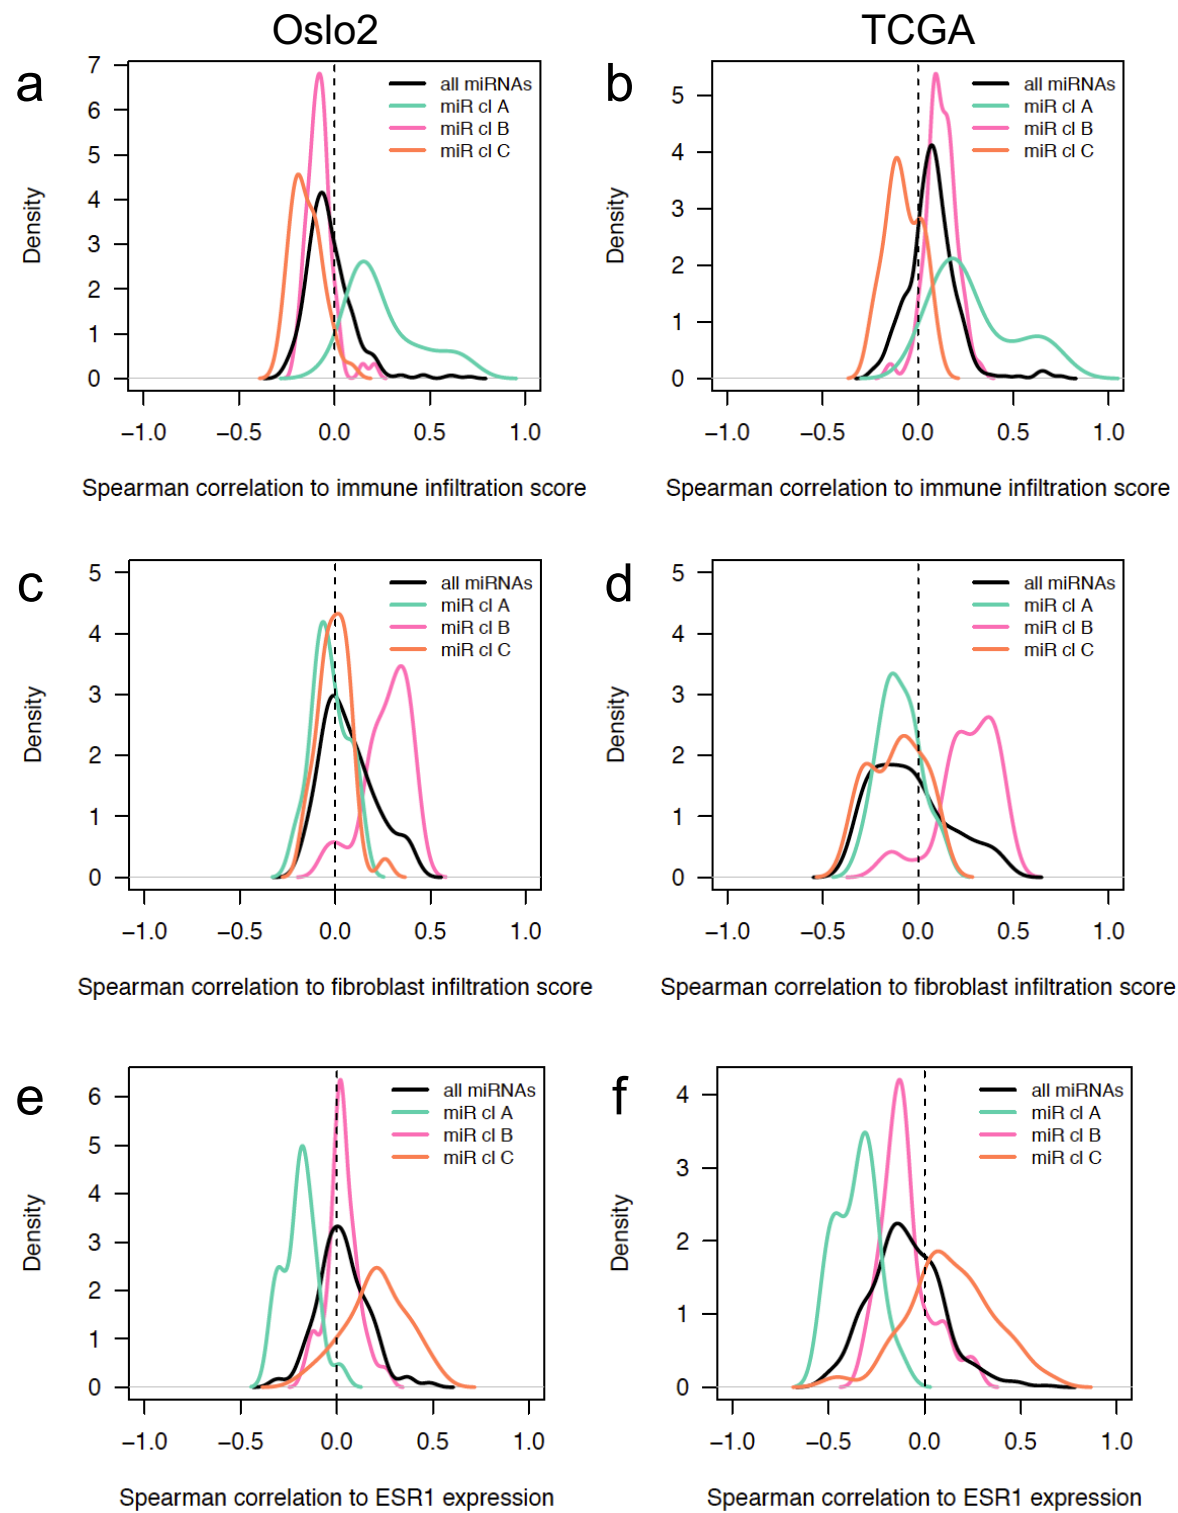

Fig. S7

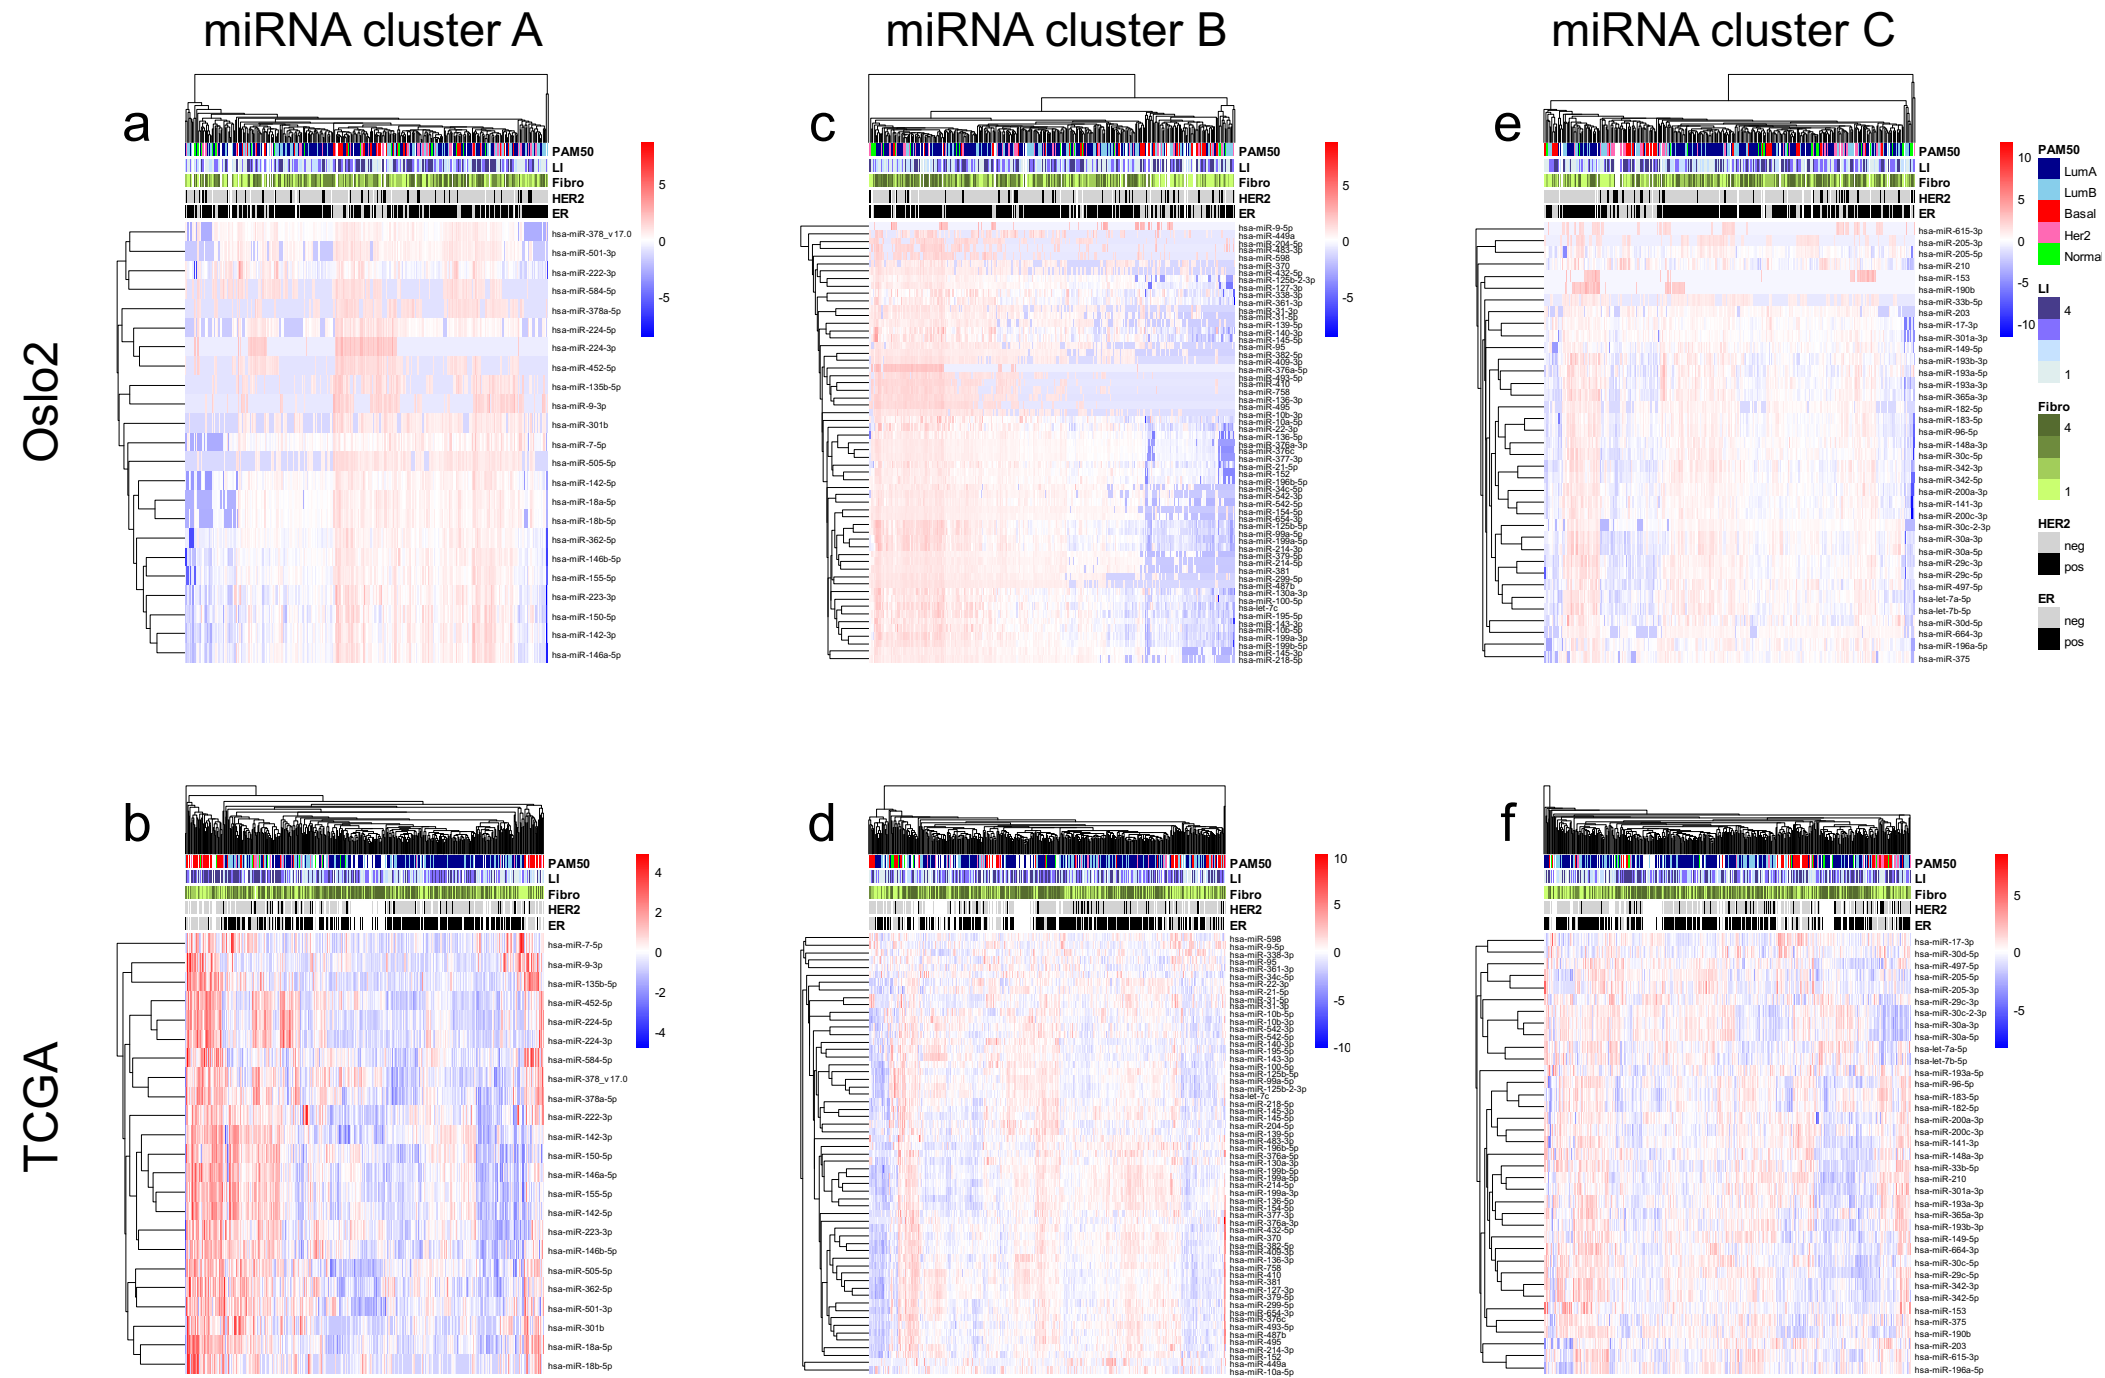

Fig. S8

CpG cluster 1  
(TCGA)

a

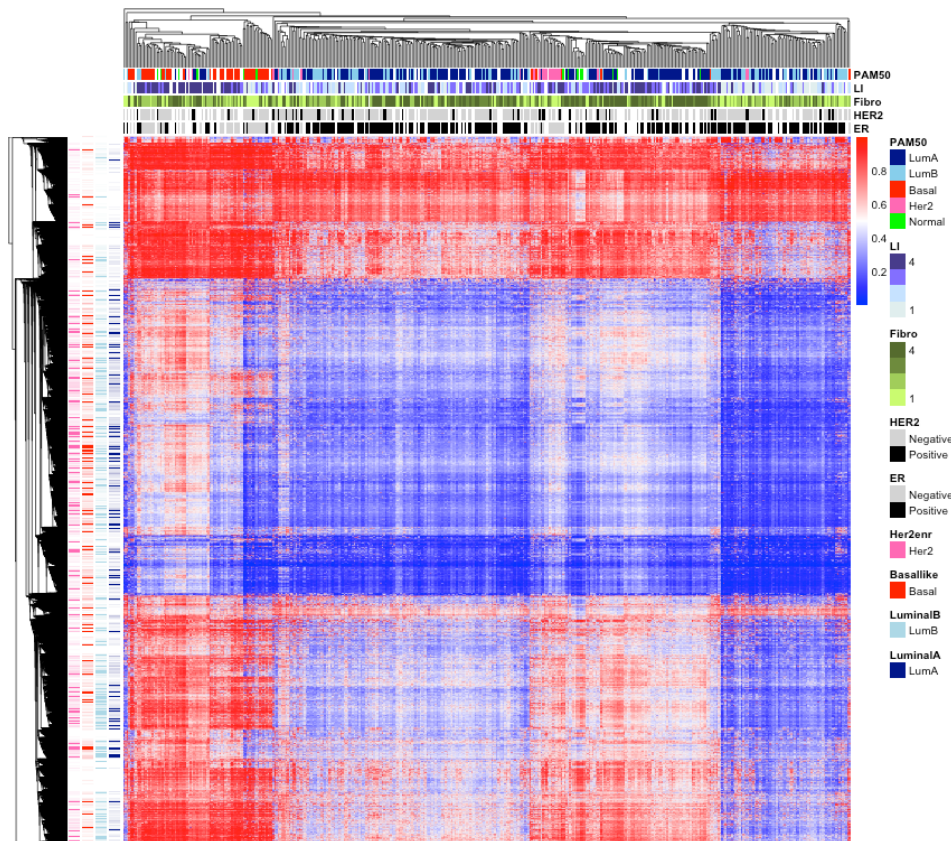

CpG cluster 2  
(TCGA)

b

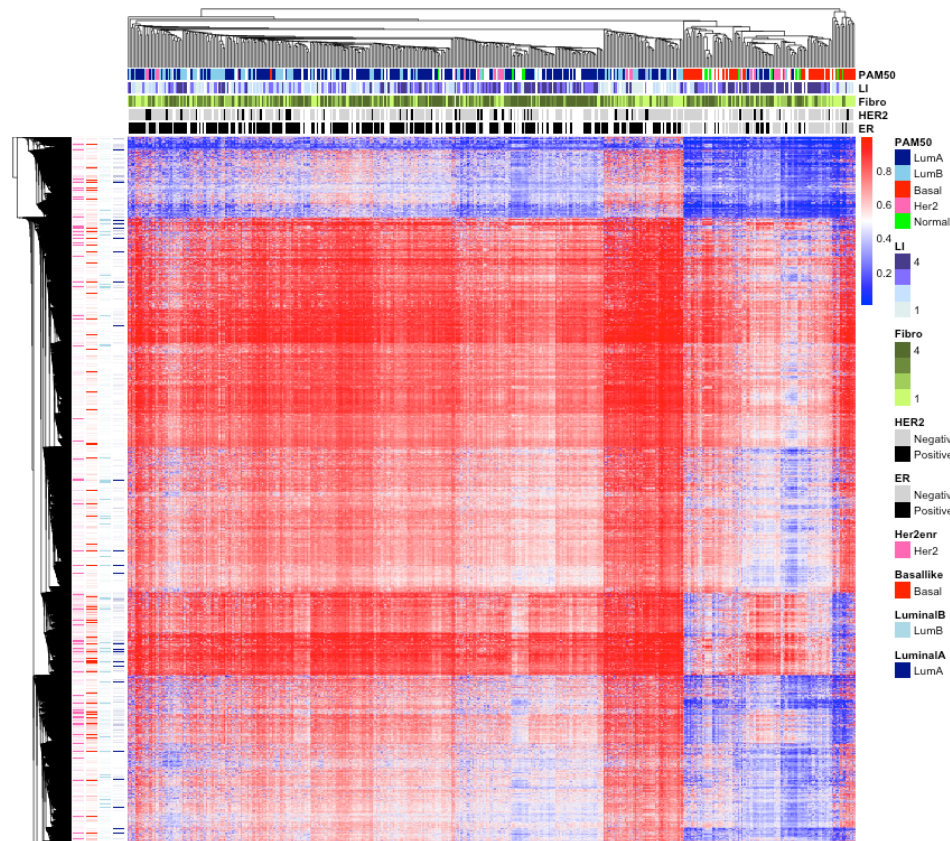



Fig. S9

a

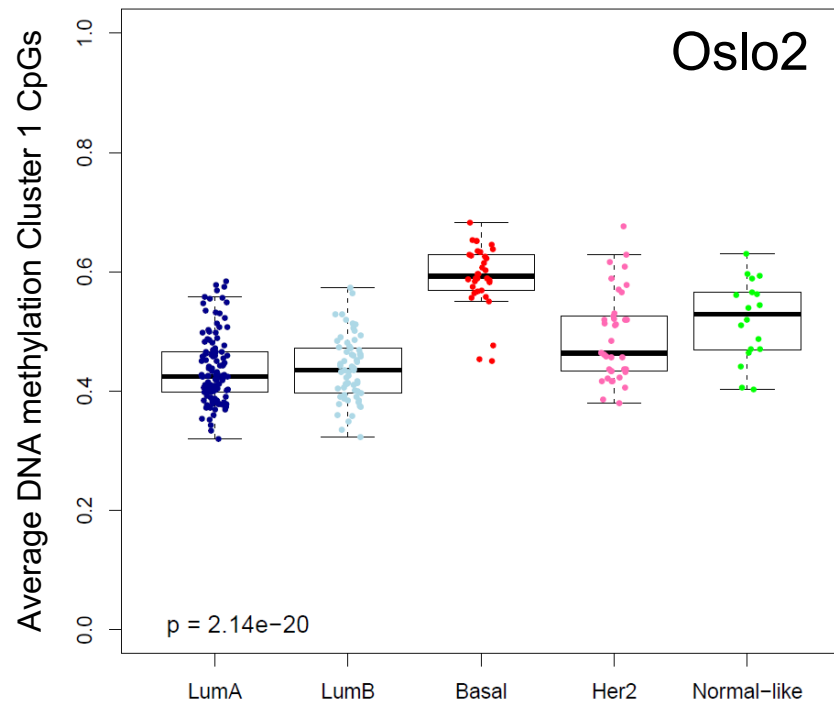

b

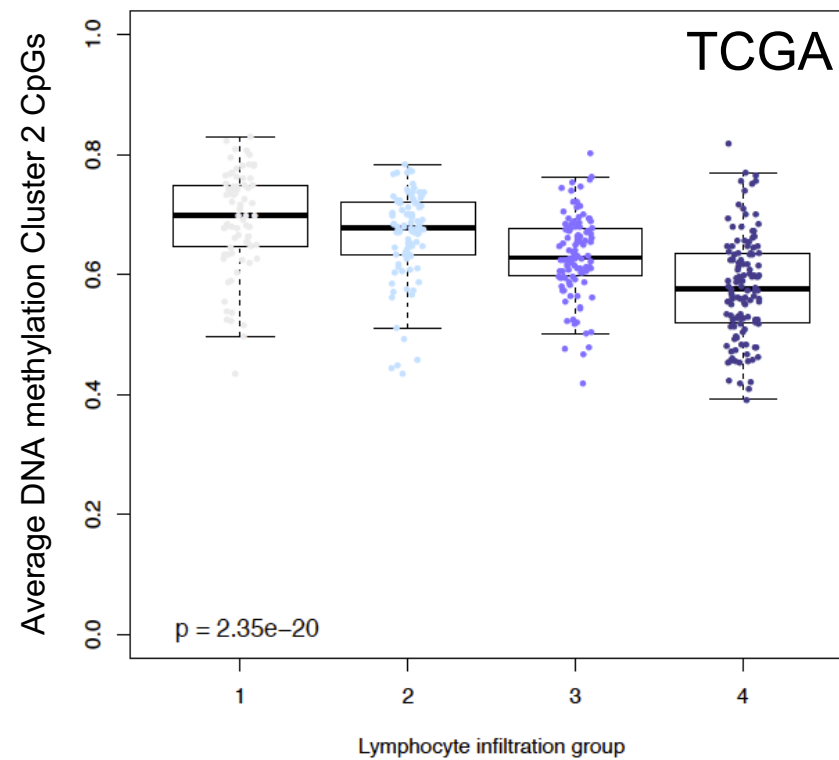

c

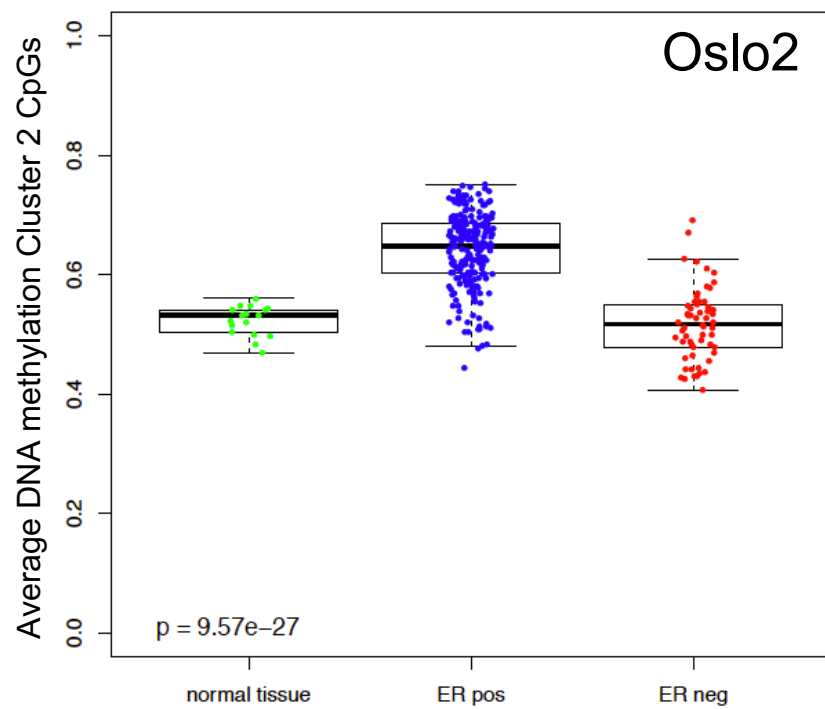

d

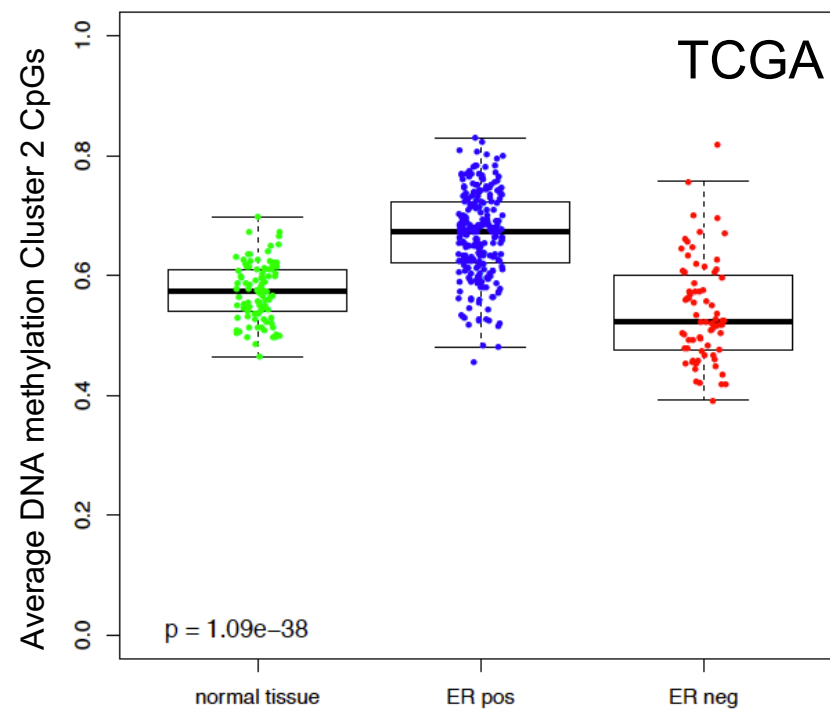

Fig. S10

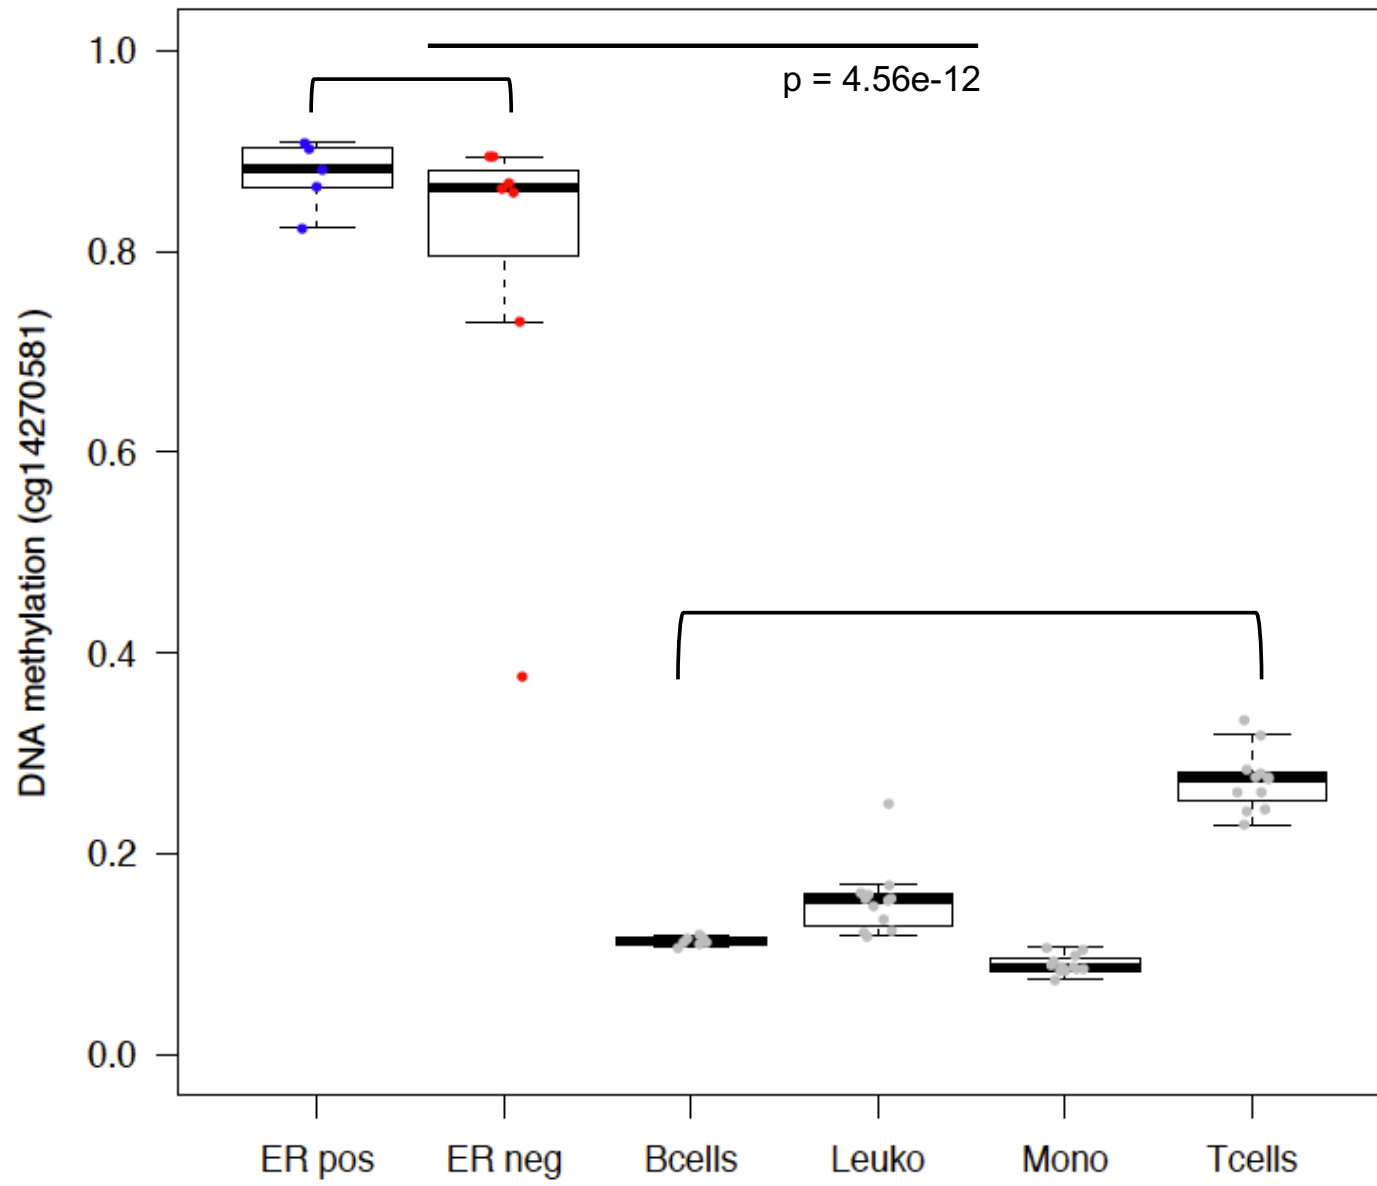

Fig. S11

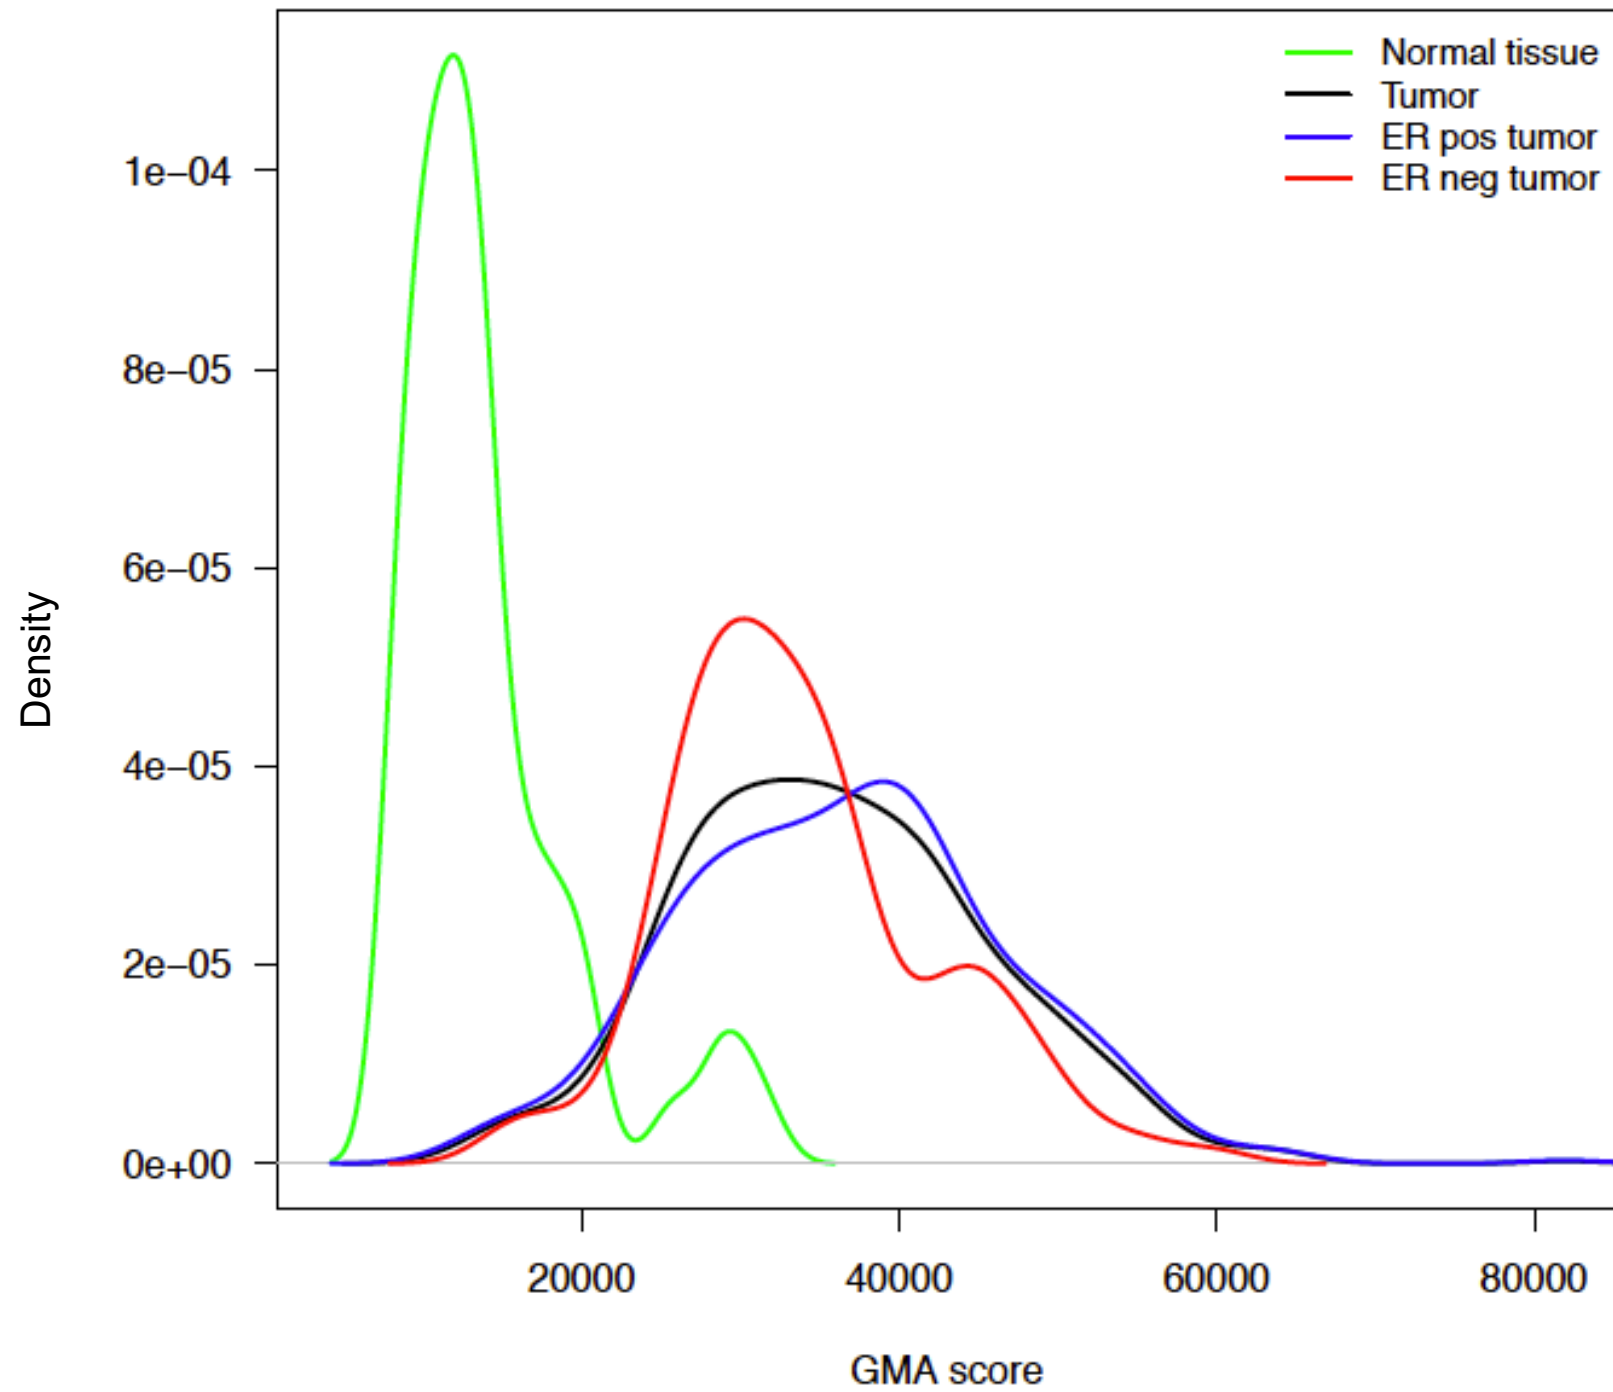

Fig. S12

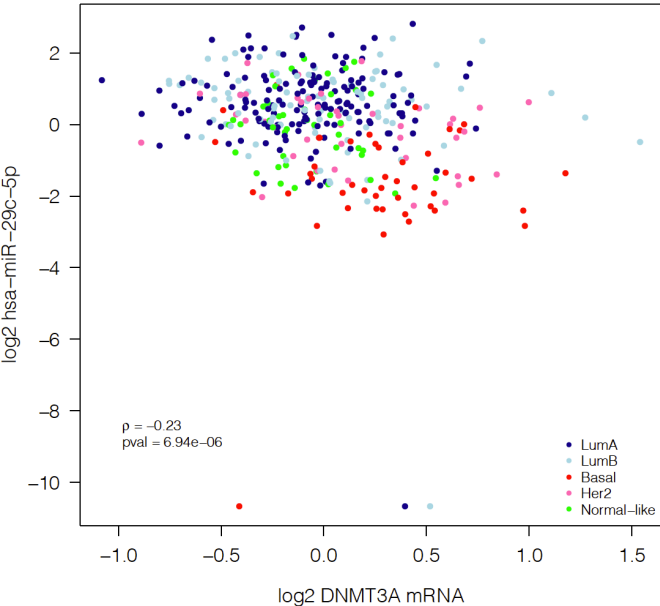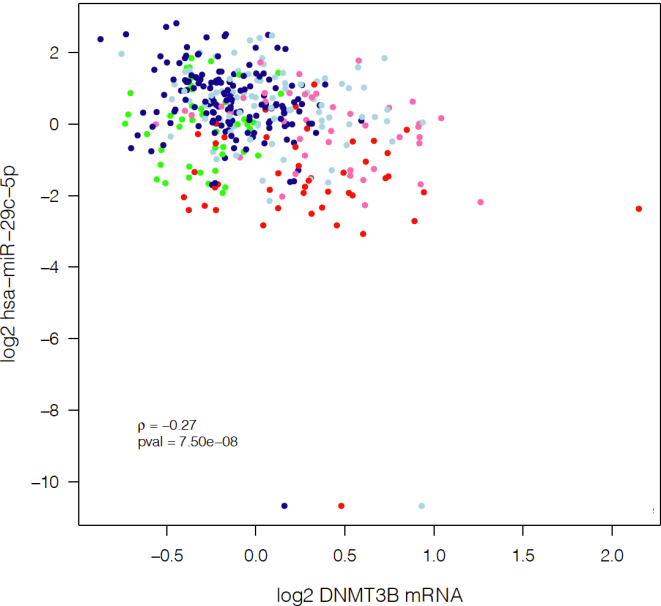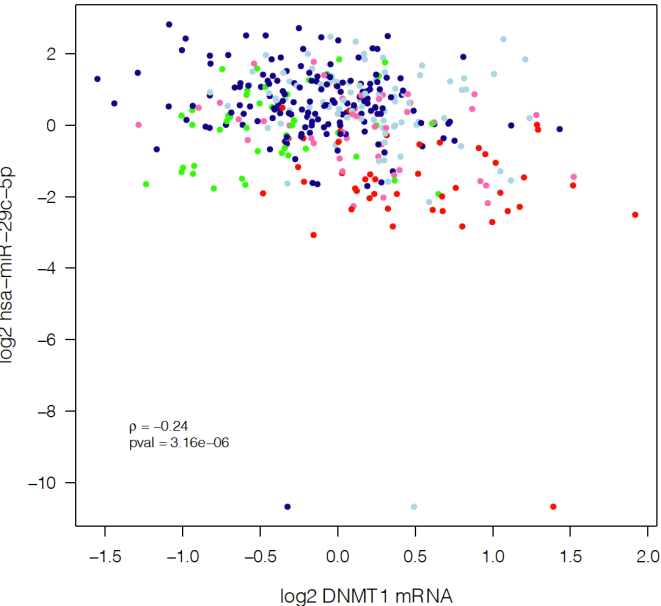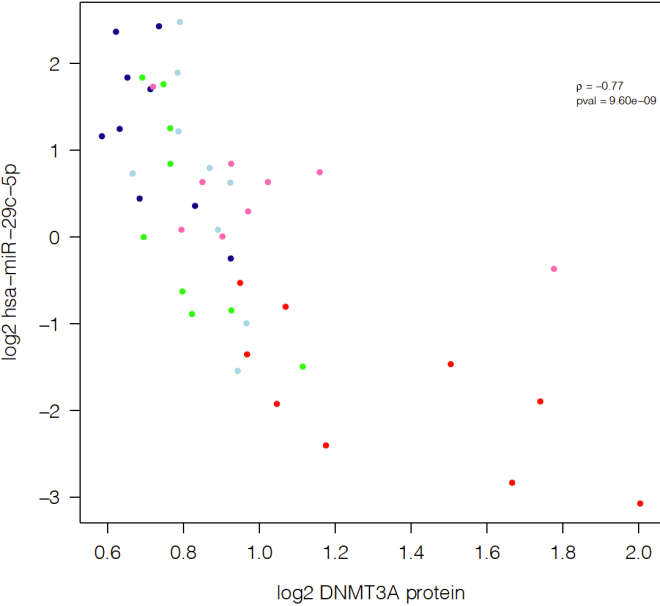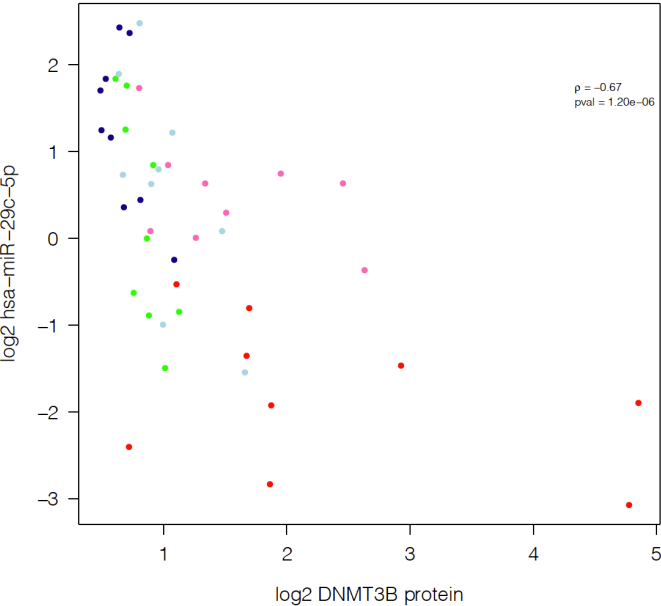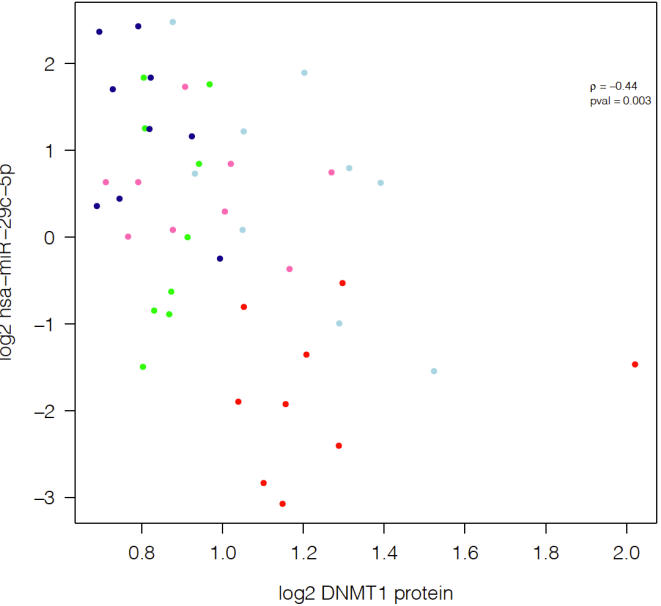

Supplement: 13073_2021_880_MOESM1_ESM.pdf [file 13073_2021_880_MOESM1_ESM.pdf]
